# Supplementary material
Source: PubMed Central journal article supplement (PMC4788339)
Supplement: robj867408.wt1_default.pdf [file robj867408.wt1_default.pdf]

Table A2.1. Values and sources of all parameters

| Parameter type          | Parameters                                                                                                         | Estimate                                 | Source and method                                                                                                                                    |
|-------------------------|--------------------------------------------------------------------------------------------------------------------|------------------------------------------|------------------------------------------------------------------------------------------------------------------------------------------------------|
| Population parameters   | Prevalence on admission (proportion colonised on admission)                                                        | 0.05<br>Sensitivity analyses: 0.02, 0.10 | [2-7]: representative high medium and low values taken from range found in literature                                                                |
|                         | Relative prevalence on admission in high risk group                                                                | 2.4 × prevalence on admission            | [8-9]: mean of prevalence in high risk group/ overall prevalence                                                                                     |
|                         | Proportion in high risk group                                                                                      | 0.18<br>Sensitivity analysis: 0.36       | [8-9]: mean of studies and mean × 2 for sensitivity analysis                                                                                         |
|                         | Ward size                                                                                                          | 10 beds<br>Sensitivity analyses: 5, 20   | Data from Intensive Care National Audit and Research Centre (ICNARC): mean and range (chosen between min and lower quartile, upper quartile and max) |
| Transmission parameters | Daily probability of colonisation                                                                                  | Normal (0.0037, 0.00043)                 | [10]: analysis of individual level data                                                                                                              |
|                         | Daily probability of infection                                                                                     | Normal (0.0006, 0.00023)                 | [10]: analysis of individual level data                                                                                                              |
|                         | Probability of progression from colonisation to infection                                                          | Normal (0.047, 0.0094)                   | [10]: analysis of individual level data                                                                                                              |
|                         | Infectivity of a colonised or infected individual                                                                  | 1                                        | Assumption (other variables estimated according to this)                                                                                             |
| Screening parameters    | <b>Conventional Culture (MS-Oxacillin):</b>                                                                        |                                          |                                                                                                                                                      |
|                         | Sensitivity (%)                                                                                                    | Normal (68.15, 19.39)                    | [11-13]: mean and SD (truncated at 100% if values >100% drawn)                                                                                       |
|                         | Specificity (%)                                                                                                    | Normal (88.23, 6.33)                     |                                                                                                                                                      |
|                         | Turn-around Time (days)                                                                                            | 4                                        | [14, 15] mean, adjusted using adjustment factor from [16]                                                                                            |
|                         | <b>Chromogenic Agar 48 hour (MRSA-ID):</b>                                                                         |                                          |                                                                                                                                                      |
|                         | Sensitivity (%)                                                                                                    | Normal ( 82.55, 4.27)                    | [17-21]: mean and SD (truncated at 100% if values >100% drawn)                                                                                       |
|                         | Specificity (%)                                                                                                    | Normal (83.05, 17.72)                    |                                                                                                                                                      |
|                         | Turn-around Time (days)                                                                                            | 3                                        | [14, 17, 19] mean, adjusted using adjustment factor from [16]                                                                                        |
|                         | <b>Chromogenic Agar early result – 24 hour (MRSA-ID):</b>                                                          |                                          |                                                                                                                                                      |
|                         | Sensitivity (%)                                                                                                    | Normal (62.17, 12.49)                    | [12, 17, 19, 20, 21 ] mean and SD                                                                                                                    |
|                         | Specificity (%)                                                                                                    | Normal (97.13, 4.17)                     |                                                                                                                                                      |
|                         | Turn-around Time (days)                                                                                            | 2                                        | Using adjustment from [16]                                                                                                                           |
|                         | <b>Polymerase Chain Reaction (IDI-MRSA):</b>                                                                       |                                          |                                                                                                                                                      |
|                         | Sensitivity (%)                                                                                                    | Normal (88.40, 5.10)                     | [15, 18, 21-28]: mean and SD                                                                                                                         |
|                         | Specificity (%)                                                                                                    | Normal (83.8, 4.74)                      |                                                                                                                                                      |
| Turn-around Time (days) | 1                                                                                                                  | [15, 16, 18, 23, 25] mean                |                                                                                                                                                      |
| Isolation parameters    | Isolation effect (contact precautions) - reduction in transmissibility of patient undergoing isolation precautions | Normal (0.365, 0.622)                    | [29]                                                                                                                                                 |
|                         | Isolation Capacity                                                                                                 | Ward size                                | Assumed contact precautions                                                                                                                          |

|                           |                                                                                                             |                                                  |                                                                                         |
|---------------------------|-------------------------------------------------------------------------------------------------------------|--------------------------------------------------|-----------------------------------------------------------------------------------------|
|                           |                                                                                                             |                                                  | could be applied to all patients                                                        |
| Decolonisation parameters | Proportion of decolonised patients who are successfully decolonised (i.e. revert to an MRSA negative state) | 53%<br>Sensitivity analysis:<br>0% and 100%      | [30]<br>Assumption                                                                      |
|                           | Decolonisation effect on susceptibility to colonisation (percentage reduction)                              |                                                  |                                                                                         |
|                           | Bodywash (chlorhexidine)                                                                                    | Normal (65%, 7%)                                 | Analysis of individual data                                                             |
|                           | Topical therapy (mupirocin)                                                                                 | 0%<br>Sensitivity analysis:<br>33%               | Assumption (effect through reduction of progression probability only)<br>Expert opinion |
|                           | Decolonisation effect on susceptibility to infection (percentage reduction)                                 |                                                  |                                                                                         |
|                           | Bodywash (chlorhexidine)                                                                                    | Normal (66%, 21%)                                | Analysis of individual data                                                             |
|                           | Topical therapy (mupirocin)                                                                                 | 0%<br>Sensitivity analysis:<br>10%               | Assumption (effect through reduction of progression probability)<br>Expert opinion      |
|                           | Effect on transmissibility of an infectious patient (percentage reduction)                                  |                                                  |                                                                                         |
|                           | Bodywash (chlorhexidine)                                                                                    | 0%                                               | Assumption (effect through susceptibility variables)                                    |
|                           | Topical therapy (mupirocin)                                                                                 | 0%<br>Sensitivity analysis:<br>12.5%             | Assumption (effect through reduction of progression probability)<br>Expert opinion      |
|                           | Effect on probability of progression /self-infection (percentage reduction)                                 |                                                  |                                                                                         |
|                           | Bodywash (chlorhexidine)                                                                                    | Normal (31%, 18%)                                | Analysis of individual data                                                             |
|                           | Topical therapy (mupirocin)                                                                                 | Normal (33%,12%)<br>Sensitivity analysis:<br>47% | Cochrane review [31]<br>Expert opinion                                                  |

Normal distributions are Normal (mean, standard deviation).
