# Supplementary material
Source: PubMed Central journal article supplement (PMC4788339)
Supplement: robj867408.wt2_default.pdf [file robj867408.wt2_default.pdf]

Table A2.2. Unadjusted daily discharge and death probabilities.

| Day | Daily probability of discharge |                     | Daily probability of death |                     |
|-----|--------------------------------|---------------------|----------------------------|---------------------|
|     | with no MRSA infection         | with MRSA infection | with no MRSA infection     | with MRSA infection |
| 0   | 0.041                          | 0.025               | 0.026                      | 0.031               |
| 1   | 0.133                          | 0.083               | 0.041                      | 0.050               |
| 2   | 0.133                          | 0.084               | 0.027                      | 0.034               |
| 3   | 0.132                          | 0.083               | 0.026                      | 0.032               |
| 4   | 0.123                          | 0.077               | 0.025                      | 0.031               |
| 5   | 0.098                          | 0.061               | 0.027                      | 0.033               |
| 6   | 0.087                          | 0.054               | 0.018                      | 0.022               |
| 7   | 0.089                          | 0.055               | 0.019                      | 0.023               |
| 8   | 0.075                          | 0.046               | 0.019                      | 0.023               |
| 9   | 0.069                          | 0.042               | 0.026                      | 0.032               |
| 10  | 0.065                          | 0.040               | 0.014                      | 0.017               |
| 11  | 0.078                          | 0.048               | 0.016                      | 0.020               |
| 12  | 0.064                          | 0.039               | 0.023                      | 0.028               |
| 13  | 0.058                          | 0.035               | 0.021                      | 0.026               |
| 14  | 0.069                          | 0.042               | 0.022                      | 0.027               |
| 15  | 0.055                          | 0.033               | 0.016                      | 0.019               |
| 16  | 0.068                          | 0.042               | 0.018                      | 0.022               |
| 17  | 0.068                          | 0.042               | 0.015                      | 0.018               |
| 18  | 0.075                          | 0.046               | 0.013                      | 0.016               |
| 19  | 0.069                          | 0.042               | 0.014                      | 0.017               |
| 20  | 0.047                          | 0.029               | 0.027                      | 0.033               |
| 21+ | 0.055                          | 0.033               | 0.012                      | 0.015               |
