# Supplementary material
Source: PubMed Central journal article supplement (PMC4788339)
Supplement: robj867408.wt3_default.pdf [file robj867408.wt3_default.pdf]

Table A2.3. Unit costs in Great British Pounds (GBP).

| Cost parameter                                                                                | 2008 value in GBP (£) <sup>1</sup> | Source <sup>2</sup> |
|-----------------------------------------------------------------------------------------------|------------------------------------|---------------------|
| Obtaining a swab in large general hospital                                                    | £4.25                              | [45]                |
| Screening culture using mannitol salt agar with oxacillin – positive result                   | £8.78                              | [45]                |
| Screening culture using mannitol salt agar with oxacillin – negative result                   | £5.44                              | [45]                |
| Screening culture using any chromogenic agar – positive result                                | £8.01                              | [45]<br>[46]        |
| Screening culture using any chromogenic agar – negative result                                | £4.67                              | [45]<br>[46]        |
| Screening culture using Polymerase Chain Reaction (SmartCylcer system with IDI MRSA Test Kit) | £20.87                             | [45]                |
| Contact precautions in general hospital                                                       | £16.30                             | [45]                |
| Decolonisation                                                                                | £55.95                             | [45]                |

1 Base year for estimates 2005/2006. Prices were re-valued to third quarter 2008 values using an index published by the Office of National Statistics [47].

2 All studies from a UK setting.
