# Supplementary material
Source: PubMed Central journal article supplement (PMC4788339)
Supplement: robj867408.wt4_default.pdf [file robj867408.wt4_default.pdf]

Table A3.1. Evaluation of the cost-effectiveness frontier of screening and decolonisation strategies in an intensive care unit setting, assuming universal pre-emptive decolonisation is excluded. Numbers refer to strategy numbers, where: 1 = baseline 'do nothing'; 5 = universal chromogenic agar screening and decolonisation of MRSA positives (with mupirocin); 6 = universal polymerase chain reaction screening and decolonisation of MRSA positives (with mupirocin). ICER = incremental cost-effectiveness ratio. QALY = quality adjusted life year.

| Move between strategies | Cost per admission | QALY per admission | Change in costs, $\Delta C$ (compared to previous strategy) | Change in effects, $\Delta E$ (compared to previous strategy) | Difference in Costs / Difference in Effects (ICER, cost/QALY) | Option evaluation |
|-------------------------|--------------------|--------------------|-------------------------------------------------------------|---------------------------------------------------------------|---------------------------------------------------------------|-------------------|
| Stay at strategy 1      | £12,667            | 9.1623             | n/a                                                         | n/a                                                           | n/a                                                           |                   |
| Or move:                |                    |                    |                                                             |                                                               |                                                               |                   |
| to 5                    | £12,639            | 9.1741             | -£28.44                                                     | 0.011751                                                      | -£2,420                                                       | Under threshold   |
| to 6                    | £12,659            | 9.1779             | £20.25                                                      | 0.00383                                                       | £5,290                                                        | Under threshold   |
