# Supplementary material
Source: PubMed Central journal article supplement (PMC4788339)
Supplement: robj867408.wt5_default.pdf [file robj867408.wt5_default.pdf]

Table A3.2. Evaluation of the cost-effectiveness frontier of screening and isolation policies in an intensive care unit setting. Numbers refer to strategy numbers, where: 1 = baseline ‘do nothing’; 2 = universal pre-emptive isolation; 6 = universal polymerase chain reaction screening and isolation of MRSA positives; 8b = chromogenic agar screening for high risk patients (using early and late result) and isolation of MRSA positives; 9 = polymerase chain reaction screening for high risk patients and isolation of MRSA positives. ICER = incremental cost-effectiveness ratio. QALY = quality adjusted life year.

| Move between strategies | Cost per admission | QALY per admission | Change in costs, $\Delta C$ (compared to previous strategy) | Change in effects, $\Delta E$ (compared to previous strategy) | Difference in Costs / Difference in Effects (ICER, cost/QALY) | Option evaluation |
|-------------------------|--------------------|--------------------|-------------------------------------------------------------|---------------------------------------------------------------|---------------------------------------------------------------|-------------------|
| Stay at strategy 1      | £12,661            | 9.1641             | -                                                           | -                                                             | -                                                             | -                 |
| Or move:                |                    |                    |                                                             |                                                               |                                                               |                   |
| to 8b                   | £12,670            | 9.1665             | £9.42                                                       | 0.002445                                                      | £3,852                                                        | Under threshold   |
| to 9                    | £12,708            | 9.1676             | £37.74                                                      | 0.001059                                                      | £35,627                                                       | Over threshold    |
| to 6                    | £12,737            | 9.1683             | £28.54                                                      | 0.000741                                                      | £38,533                                                       | Over threshold    |
| to 2                    | £12,771            | 9.1686             | £34.19                                                      | 0.000289                                                      | £118,399                                                      | Over threshold    |
